# Supplementary material for: Anodal tDCS and High-Frequency tRNS Targeting the Occipitotemporal Cortex Do Not Always Enhance Face Perception
Source: Front Neurosci. 2019 Feb 12;13:78. doi: 10.3389/fnins.2019.00078 (PMC6379483; doi:10.3389/fnins.2019.00078)
Supplement: Supplementary file 1 [file Table_1.XLSX]

## Sheet: Experiment 1
ID	CONDITION	AGE	SEX	HANDEDNESS	VISION	Race	Ethnicity	CFMTTotal	EHTOTAL	TOPF	EXP_ACC	EXP_CORRMEAN	IDE_ACC	IDE_CORRMEAN	OBJ_ACC	OBJ_CORRMEAN
1	1	18	1	1	2	2	Asian	71	100	101	74.2857	2704.23	97.1429	2083.68	75.7143	2743.25
2	1	19	2	1	1	1	White	60	105	95	50	1363.46	42.8571	776.7	62.8571	2569.57
3	1	19	2	1	2	2	Asian	62	88	102	58.5714	2353.88	94.2857	1843.94	64.2857	2154.76
4	1	18	2	1	2	2	Other	48	105	82	71.4286	2557.04	85.7143	2679.1	84.2857	2438.42
5	1	23	2	1	1	2	Mixed	53	108	94	57.1429	1746.42	70	1586.51	72.8571	1684.51
6	1	27	2	1	1	1	White	64	111	100	74.2857	2519.04	82.8571	2335.17	74.2857	2414.77
7	1	23	2	1	1	1	White	52	108	98	80	2700.46	48.5714	2532.76	77.1429	2438.59
8	1	19	2	1	2	1	White	53	101	89	45.7143	2007.53	84.2857	1957.51	74.2857	1824
9	1	22	2	1	2	2	Other	72	112	87	74.2857	2789.4	90	2243.16	78.5714	2622.76
10	1	21	1	1	1	1	White	54	90	92	52.8571	2381.49	75.7143	1845.4	71.4286	2389.42
11	1	23	2	1	2	2	Mixed	69	111	107	70	2003.82	95.7143	1489.57	82.8571	1534.22
12	1	20	1	1	2	2	Other	54	84	102	51.4286	2893.22	87.1429	2521.11	70	2500.53
13	1	19	2	1	1	2	Other	51	108	100	54.2857	2644.24	85.7143	2430.95	68.5714	2603.27
14	1	20	2	1	2	2	Asian	55	92	79	67.1429	2514.89	84.2857	2134.8	77.1429	2585.72
15	1	19	2	1	2	1	White	54	96	91	61.4286	1840.3	88.5714	2132.52	70	2334.94
16	1	25	1	1	2	1	White	48	102	93	58.5714	2145.61	81.4286	2153.7	28.5714	2114.45
17	1	45	2	1	1	2	Other	71	109	119	70	2675.04	94.2857	2415.06	54.2857	2747.39
18	1	21	2	1	1	2	Mixed	50	82	95	68.5714	2268.79	71.4286	2371.18	78.5714	2139.65
19	1	20	2	1	1	2	Asian	62	105	117	72.8571	2371	95.7143	2062.1	82.8571	2081.4
20	1	21	2	1	2	1	White	46	105	106	68.5714	2286.92	88.5714	2218.68	82.8571	2487.4
21	1	19	2	1	2	2	Asian	53	106	116	54.2857	2407.45	87.1429	2175.59	78.5714	2309.22
22	1	23	2	1	1	2	Asian	57	102	101	70	2666.49	88.5714	2125.34	77.1429	2323.87
23	1	29	2	1	1	1	White	63	112	113	68.5714	2359.79	94.2857	2222.71	88.5714	2374.47
24	1	19	2	1	1	1	White	58	106	107	55.7143	2499.87	92.8571	2567.02	77.1429	2326.81
25	1	37	2	1	1	1	White	65	113	92	74.2857	2560.1	95.7143	2188.72	81.4286	2407.11
26	1	19	2	1	1	1	White	46	87	82	34.2857	1221.25	81.4286	1989.58	22.8571	567.125
27	1	37	2	1	2	2	Asian	46	107	81	61.4286	2551.19	77.1429	2902.39	67.1429	2531.21
28	1	18	2	1	2	1	White	60	69	89	64.2857	2282.44	84.2857	2359.97	57.1429	1910.62
29	1	27	2	1	1	1	White	41	96	114	54.2857	2727.97	78.5714	2548.65	65.7143	2353.72
30	2	19	2	1	1	1	White	57	108	113	82.8571	2300.53	77.1429	2205.8	78.5714	2348.02
31	2	30	2	1	1	1	White	52	112	101	71.4286	2322.6	84.2857	2217.88	80	2394.98
32	2	21	2	1	2	1	White	55	109	73	57.1429	2489.12	81.4286	2118.91	80	2207.52
33	2	23	2	1	2	1	White	46	101	95	67.1429	2528.4	81.4286	1909.82	85.7143	2256.22
34	2	35	1	1	2	2	Asian	70	104	105	65.7143	2020.76	81.4286	2218.19	57.1429	2640.78
35	2	22	1	1	1	1	White	51	111	118	57.1429	2741.12	81.4286	2692.14	72.8571	2530.86
36	2	21	2	1	1	1	White	54	108	91	80	2518.7	84.2857	2219.59	81.4286	2561.93
37	2	26	2	1	1	1	White	48	103	96	58.5714	2695.59	61.4286	2922.63	68.5714	2514.85
38	2	21	2	1	2	1	White	62	100	92	60	2351.67	91.4286	1638.41	77.1429	2090.5
39	2	49	2	1	2	1	White	42	99	95	55.7143	2733.41	61.4286	2355.65	64.2857	3032.8
40	2	21	2	1	1	2	Asian	41	77	86	30	879.905	58.5714	2240.98	64.2857	2216.22
41	2	24	2	1	1	2	Mixed	68	104	77	52.8571	2755.86	85.7143	2691.17	82.8571	2908.22
42	2	18	2	1	1	2	African/Caribbean	60	106	74	37.1429	2469.58	80	2338.43	61.4286	2585.77
43	2	24	1	1	1	2	Other	56	102	101	52.8571	2318.32	80	2225.05	75.7143	1953.7
44	2	21	2	1	1	2	Asian	69	80	113	71.4286	2668.4	98.5714	2118.43	70	2549.16
45	2	20	1	1	1	2	Other	62	105	91	72.8571	2722.43	42.8571	2197.53	62.8571	2688.95
46	2	20	2	1	1	2	Other	64	96	100	52.8571	1844.43	67.1429	2328.6	70	2347.86
47	2	22	2	1	2	2	Other	52	88	106	50	1601.26	35.7143	970.52	45.7143	1234.41
48	2	20	1	1	1	1	White	52	94	95	61.4286	2292.05	92.8571	2342.25	85.7143	2703.1
49	2	23	2	1	1	1	White	46	97	130	61.4286	2366.53	88.5714	2042.77	75.7143	2289.06
50	2	18	1	1	1	1	White	56	93	97	54.2857	2399.82	84.2857	2404.34	71.4286	2254.9
51	2	18	2	1	1	2	Asian	67	107	118	68.5714	3033.67	81.4286	2542.28	68.5714	2831.15
52	2	18	2	1	1	1	White	68	107	97	68.5714	2492.81	98.5714	2064.22	74.2857	2461.29
53	2	20	2	1	1	2	Asian	42	90	98	64.2857	2600.82	77.1429	2243.59	82.8571	2273.79

## Sheet: Experiment 2
ID	CONDITION	AGE	SEX	HANDEDNESS	VISION	RACE	Ethnic Category	CFMTTotal	EHTOTAL	TOPF	EXP_ACC	EXP_CORRMEAN	IDE_ACC	IDE_CORRMEAN	OBJ_ACC	OBJ_CORRMEAN
S054	1	20	1	1	1	2	Latino	58	107	80	68.5714	2525.29	85.7143	2171.43	78.5714	2574.31
S055	1	20	2	1	1	2	Mixed	62	114	116	61.4286	1863.02	70	1782.12	72.8571	1762.73
S056	1	20	1	1	1	1	White	62	104	90	57.1429	2627.47	88.5714	2263.52	65.7143	2674.22
S057	1	23	2	1	1	2	African/Caribbean	67	78	73	65.7143	2195.78	88.5714	1974.56	77.1429	1593.74
S058	1	19	2	1	2	2	Asian	52	98	102	60	1868.95	91.4286	1555.64	52.8571	1950.3
S059	1	27	1	1	1	2	African/Caribbean	53	110	111	67.1429	2432.38	88.5714	2222.94	82.8571	2068.29
S060	1	37	2	1	2	1	White	64	111	95	71.4286	2539.94	81.4286	2335.63	82.8571	2069.16
S061	1	26	1	1	2	1	White	38	108	97	51.4286	2416.14	84.2857	2450.17	87.1429	2576.34
S062	1	29	2	1	2	1	White	47	108	118	75.7143	2333.91	95.7143	2144.45	87.1429	1792.72
S063	1	22	2	1	2	2	Latino	48	112	99	62.8571	2373.45	90	2260.46	85.7143	2358.07
S064	1	46	1	1	1	2	African/Caribbean	63	69	78	57.1429	3156.7	88.5714	2600.68	68.5714	3059.42
S065	1	34	2	1	2	1	White	55	92	110	77.1429	2682.37	72.8571	2552.84	92.8571	2615.71
S066	1	22	2	1	2	1	White	52	102	109	67.1429	2215.98	91.4286	2307.16	87.1429	2247.16
S067	1	23	2	1	1	1	White	42	105	116	71.4286	2087.3	84.2857	1723.88	85.7143	1753.23
S068	1	19	1	1	1	2	Mixed	56	67	97	57.1429	2616.5	90	2309.37	80	2468.66
S069	1	26	2	1	1	1	White	53	111	111	60	1608.02	87.1429	1509.95	87.1429	1570.52
S070	1	18	1	1	1	1	White	48	91	87	41.4286	1837.97	61.4286	2362.09	67.1429	2284.91
S071	1	31	2	1	1	2	African/Caribbean	50	110	105	62.8571	1995.7	87.1429	2111.69	81.4286	1875.07
S072	1	37	2	1	2	1	White	57	98	116	64.2857	2831.76	94.2857	2249.02	72.8571	2562.55
S073	2	22	2	1	1	2	African/Caribbean	67	89	76	52.8571	2337.22	94.2857	2562.73	71.4286	2965.14
S074	2	38	2	1	1	1	White	49	101	112	61.4286	2918.98	90	2510.38	82.8571	2605.9
S075	2	27	1	1	1	2	Mixed	48	104	85	54.2857	2486.89	74.2857	2355.02	75.7143	2526.72
S076	2	24	2	1	1	1	White	56	92	88	64.2857	2498.2	91.4286	2380.66	74.2857	2432.56
S077	2	20	2	1	2	2	Asian	47	77	92	67.1429	1608.34	70	1393.14	77.1429	1629.37
S078	2	19	2	1	1	1	White	43	102	101	68.5714	2052.27	52.8571	2360.22	81.4286	1972.35
S079	2	20	2	1	1	1	White	53	93	102	67.1429	2133.17	85.7143	2060.88	80	2173.75
S080	2	33	1	1	1	1	White	66	110	111	65.7143	2821.72	92.8571	2513.91	90	2490.68
S081	2	22	1	1	1	2	Asian	43	113	114	67.1429	2268.55	87.1429	2559.21	75.7143	2692.26
S082	2	22	2	1	1	1	White	65	97	99	68.5714	2652.92	91.4286	2212.81	72.8571	2786.92
S083	2	22	2	1	1	1	White	38	106	103	74.2857	2490.31	94.2857	2091.58	84.2857	1989.71
S084	2	23	2	1	1	1	White	64	108	123	75.7143	2106.36	94.2857	1676.14	87.1429	1678.36
S085	2	19	1	1	1	2	Latino	47	75	82	17.1429	2943.92	48.5714	2199.53	47.1429	2583.18
S086	2	22	2	1	1	2	Asian	62	109	118	50	1459.54	87.1429	1802.08	82.8571	1907.64
S087	2	19	2	1	1	1	White	58	87	90	30	2466.48	77.1429	1795.7	67.1429	2250.96
S088	2	18	2	1	1	2	Pacific Islander	47	114	101	70	2474.73	90	2104.46	74.2857	1874.9
S089	2	54	2	1	2	1	White	70	112	122	55.7143	2094	97.1429	1880.57	75.7143	2223.96
S090	2	19	1	1	1	2	Pacific Islander	49	109	109	75.7143	2757.36	95.7143	2105.46	85.7143	2480.15
S091	2	22	1	1	1	1	White	49	114	83	64.2857	2668.69	74.2857	2446.5	87.1429	2373.31
S092	2	25	2	1	1	2	African/Caribbean	41	91	95	62.8571	2716.18	60	2930.81	70	2643.45
